# Supplementary material
Source: PubMed Central journal article supplement (PMC4977368)
Supplement: supp_WNL.0000000000002939_558.pdf [file supp_WNL.0000000000002939_558.pdf]

# Imaging and rare *APOE* alleles

## Alzheimer disease as a developmental disorder

Rebecca Christine  
Knickmeyer, PhD  
M. Elizabeth Ross, MD,  
PhD

Correspondence to  
Dr. Knickmeyer:  
rebecca\_knickmeyer@med.unc.edu

*Neurology*® 2016;87:558–559

The association between genetic variants in *APOE* and risk of Alzheimer disease (AD) is well known and there exists a considerable body of research into how the 3 major isoforms of *APOE*-encoded ApoE ( $\epsilon 2$ ,  $\epsilon 3$ , and  $\epsilon 4$ ) contribute to AD pathology.<sup>1</sup> These investigations have largely focused on how these different isoforms differentially modulate  $\beta$ -amyloid aggregation and clearance, but a growing body of research suggests these alleles also have important developmental effects that may set up a neuroanatomical vulnerability to AD. Shaw et al.<sup>2</sup> were the first to demonstrate that  $\epsilon 4$  carriers exhibited cortical thinning and reduced volumes in AD-vulnerable brain regions during adolescence. Several years later, Knickmeyer et al.<sup>3</sup> demonstrated that this effect was already present at birth, suggesting an origin in prenatal brain development. Complementary work in mice expressing human ApoE isoforms indicated that the  $\epsilon 4$  allele reduces dendritic spine density as early as 1 month of age (approximately equivalent to a prepubertal child). The  $\epsilon 2$  allele resulted in longer dendritic spines and increased complexity at 1 month of age.<sup>4</sup> In addition, several studies have reported better cognitive performance in young  $\epsilon 4$  carriers, indicating possible pleiotropic effects on cognition across the lifespan, such that  $\epsilon 4$ -related benefits in childhood reverse to become risk factors for cognitive impairment and dementia in later life.<sup>5</sup> However, a 2012 meta-analysis found no beneficial results of the  $\epsilon 4$  allele on cognition in children, adolescents, and young adults.<sup>6</sup>

In this issue of *Neurology*®, Chang et al.<sup>7</sup> substantially extend this literature by examining how *APOE* allele status influences brain structure and cognitive performance using a large and well-characterized sample ( $n = 1,187$ ; approximately half female) ranging from 3 to 20 years of age. Neuroimaging outcomes include subcortical volumes and fractional anisotropy (an index of myelination and microstructural integrity), and cortical volumes, thickness, and surface area in 20 regions of interest, selected for their relevance to AD. Also assessed were measures of cognitive flexibility, visual attention, episodic memory, and working

memory selected from the NIH Toolbox Cognition Battery. This impressive collaborative effort among 10 different sites participating in the PING (Pediatric Imaging, Neurocognition, and Genetics) Consortium has allowed the authors to examine all 6 allele permutations ( $\epsilon 2\epsilon 2$ ,  $\epsilon 2\epsilon 3$ ,  $\epsilon 3\epsilon 3$ ,  $\epsilon 3\epsilon 4$ ,  $\epsilon 4\epsilon 4$ , and  $\epsilon 2\epsilon 4$ ) including rare allelic groups that have either been excluded from previous research or collapsed into broader categories. Admirable efforts were made to control for covariates, including genetic ancestry, socioeconomic status, and variation in scanner devices among different sites, in addition to sex and age. Major findings include widespread and relatively stable reductions in cortical surface area in  $\epsilon 2\epsilon 4$  children, altered age-related slopes for cortical volume and thickness in  $\epsilon 2\epsilon 4$  and  $\epsilon 4\epsilon 4$  children, smaller hippocampal volumes in younger  $\epsilon 2\epsilon 4$  children and lower hippocampal fractional anisotropy in younger  $\epsilon 4\epsilon 4$  children, which mirror findings in elderly  $\epsilon 4$  and  $\epsilon 2$  carriers,<sup>8</sup> and poorer performance on attention and working memory tasks in younger  $\epsilon 2\epsilon 4$  and  $\epsilon 4\epsilon 4$  children. Taken together, these results argue against an early, beneficial effect of the  $\epsilon 4$  allele for either cognitive performance or brain development.

The major strength of the reported study is the large sample size and the breadth of neuroimaging and cognitive measures collected. The major limitation is its reliance on cross-sectional data to interpret genetic effects on neurodevelopmental trajectories. Brain development is a highly dynamic process with substantial interindividual variation. Hence, inferential errors can result from even superb cross-sectional research. This is particularly problematic when sample sizes are relatively small. Here, the rare allelic groups comprise approximately 25 to 28 cases for  $\epsilon 4\epsilon 4$  and 17 to 19 cases for  $\epsilon 2\epsilon 4$ , depending on the phenotype examined. Given the wide age range of the study (17 years), each age point is represented by only a few individuals of the  $\epsilon 4\epsilon 4$ ,  $\epsilon 2\epsilon 4$ , and  $\epsilon 2\epsilon 2$  cases relative to the larger number (140–730) of more common *APOE* genotypes. For this reason, the most rare,  $\epsilon 2\epsilon 2$ , cases were not included in group analyses. Despite these caveats, the results are extremely

See page 585

From the Department of Psychiatry (R.C.K.), University of North Carolina, Chapel Hill; and Center for Neurogenetics (M.E.R.), Weill Cornell Medical College, New York, NY.

Go to [Neurology.org](http://Neurology.org) for full disclosures. Funding information and disclosures deemed relevant by the authors, if any, are provided at the end of the editorial.

intriguing and should stimulate additional research in large, longitudinal samples to confirm the true developmental trajectories of  $\epsilon 4\epsilon 4$ ,  $\epsilon 2\epsilon 4$ , and  $\epsilon 2\epsilon 2$  children. It is also clear from the data presented that collapsing rare allelic groups into broader categories for research is inadvisable, as brain development, aging, and cognition may vary substantially across specific  $\epsilon 4$  or  $\epsilon 2$  genotypes.

While these results do not have immediate implications for the clinic, they confirm that ApoE affects brain morphometry and function early in life in ways that are independent from  $\beta$ -amyloid, and support the provocative idea that AD is, in part, a developmental disorder. This perspective is likely germane to a number of neuropsychiatric disorders and should push investigators to look ever earlier, to the initiation of relevant neurodevelopmental processes and what might tip the balance away from disease toward healthier outcomes. Ultimately, studying *APOE* polymorphisms in young children may allow us to develop behavioral interventions and pharmaceutical agents that could normalize adverse developmental trajectories, thereby postponing the onset of AD or reducing its severity.

#### STUDY FUNDING

No targeted funding reported.

#### DISCLOSURE

Over the last 2 years, Dr. Knickmeyer has received grant support from the National Institute of Mental Health and compensation from the National Institute of Environmental Health Sciences for participation

in scientific review of grant applications. Dr. Ross is supported by grants from the National Institute of Neurological Disorders and Stroke and the National Institute of Child Health and Human Development as well as research grants from Qatar Foundation. Dr. Knickmeyer has been a coinvestigator on 2 grants supported by Pfizer, but received no direct salary support. None of these relationships constitute a conflict of interest with the current editorial. Go to [Neurology.org](http://Neurology.org) for full disclosures.

#### REFERENCES

1. Huang Y, Mahley RW. Apolipoprotein E: structure and function in lipid metabolism, neurobiology, and Alzheimer's diseases. *Neurobiol Dis* 2014;6:3–12.
2. Shaw P, Lerch JP, Pruessner JC, et al. Cortical morphology in children and adolescents with different apolipoprotein E gene polymorphisms: an observational study. *Lancet Neurol* 2007;6:494–500.
3. Knickmeyer RC, Wang J, Zhu H, et al. Common variants in psychiatric risk genes predict brain structure at birth. *Cereb Cortex* 2013;24:1230–1246.
4. Dumanis SB, Tesoriero JA, Babus LW, et al. ApoE4 decreases spine density and dendritic complexity in cortical neurons in vivo. *J Neurosci* 2009;29:15317–15322.
5. Han SD, Bondi MW. Revision of the apolipoprotein E compensatory mechanism recruitment hypothesis. *Alzheimers Dement* 2008;4:251–254.
6. Ihle A, Bunce D, Kliegel M. APOE epsilon4 and cognitive function in early life: a meta-analysis. *Neuropsychology* 2012;26:267–277.
7. Chang L, Douet V, Bloss C, et al. Gray matter maturation and cognition in children with different *APOE*  $\epsilon$  genotypes. *Neurology* 2016;87:585–594.
8. Hostage CA, Roy Choudhury K, Doraiswamy PM, Petrella JR; Alzheimer's Disease Neuroimaging Initiative. Dissecting the gene dose-effects of the APOE epsilon4 and epsilon2 alleles on hippocampal volumes in aging and Alzheimer's disease. *PLoS One* 2013;8:e54483.
